# Supplementary material for: c-Src kinase inhibits osteogenic differentiation via enhancing STAT1 stability
Source: PubMed Central journal article supplement (PMC7660501; doi:10.1371/journal.pone.0241646), 2020-11-12

Figure S1

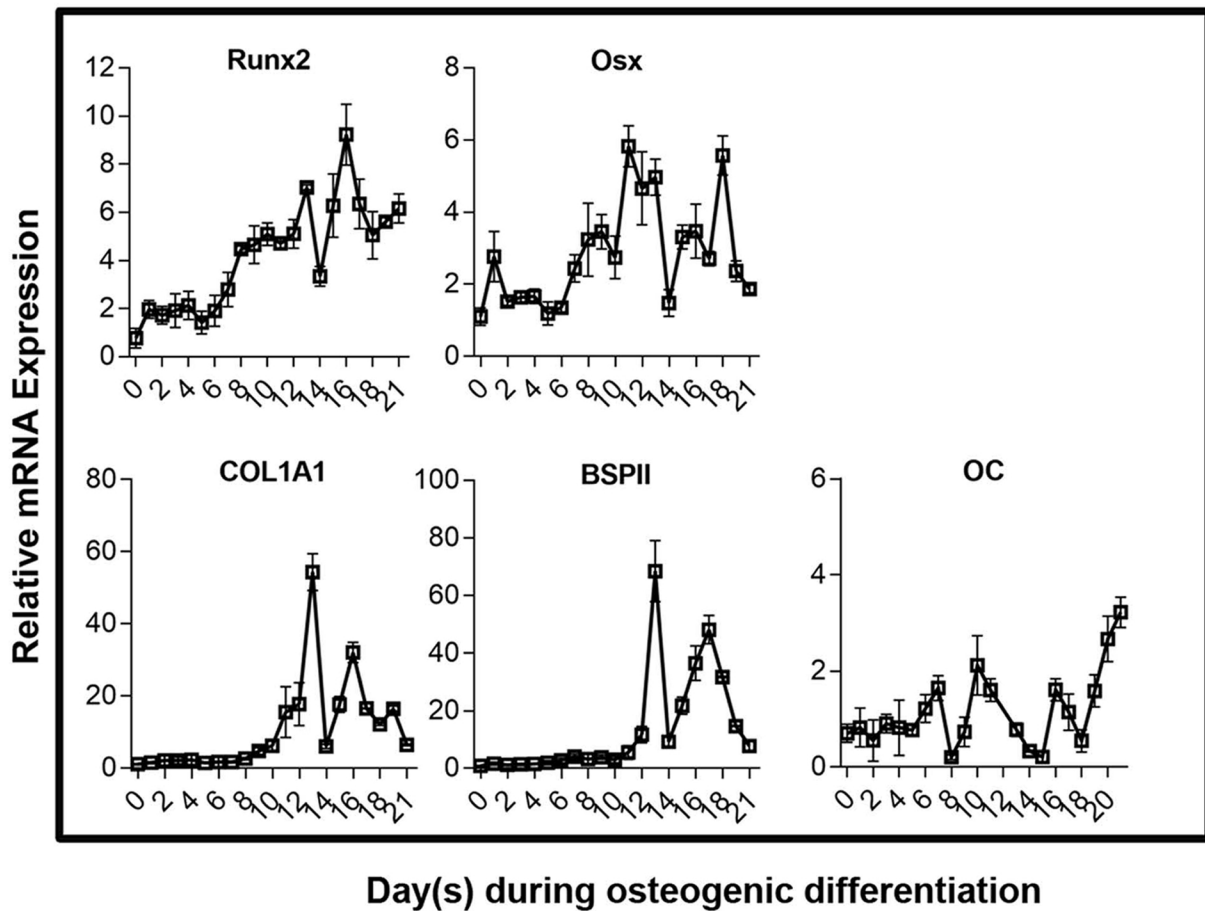

Supplement: pone.0241646.s001.pdf [file pone.0241646.s001.pdf]
