# Supplementary material for: c-Src kinase inhibits osteogenic differentiation via enhancing STAT1 stability
Source: PubMed Central journal article supplement (PMC7660501; doi:10.1371/journal.pone.0241646), 2020-11-12

**Figure S2**

**A**

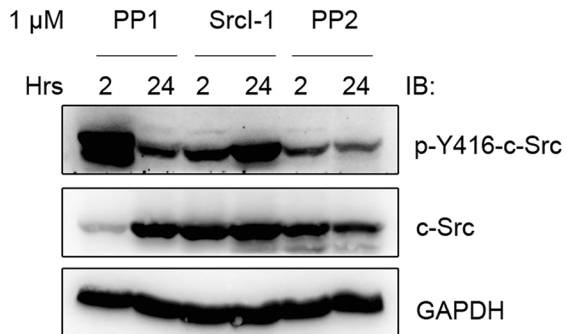

**B**

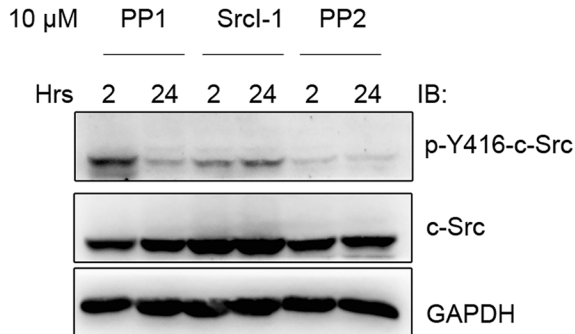

**C**

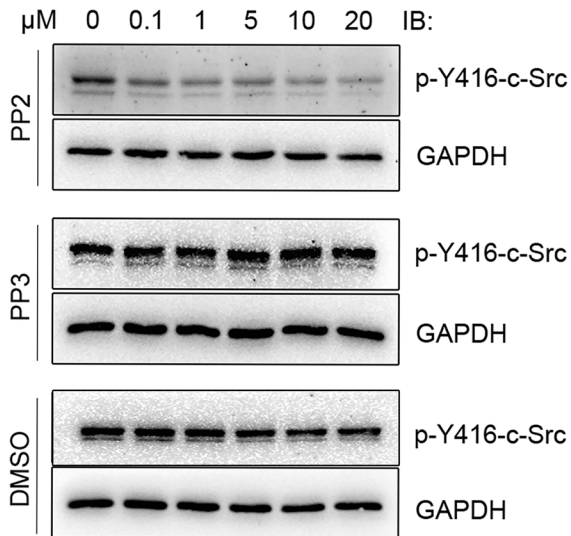

**E**

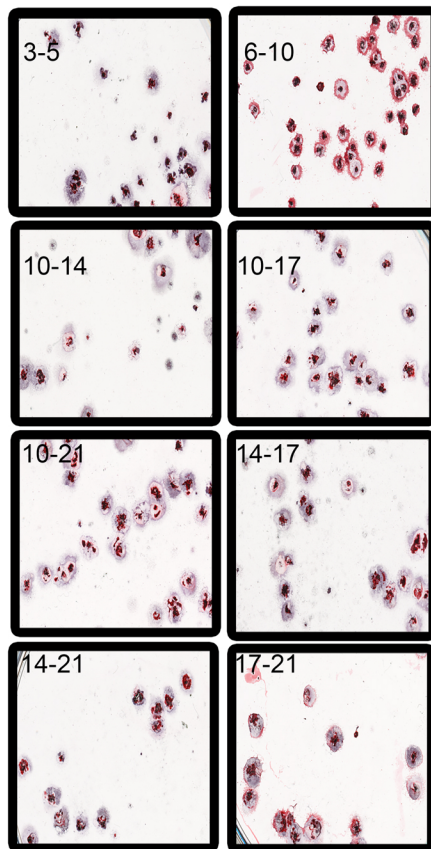

**D**

Src inhibition during 21-day osteogenic differentiation from mESCs

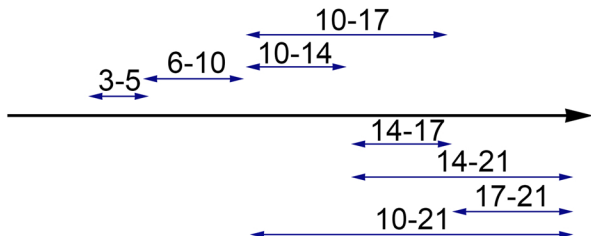

Supplement: pone.0241646.s002.pdf [file pone.0241646.s002.pdf]
