# Supplementary material for: c-Src kinase inhibits osteogenic differentiation via enhancing STAT1 stability
Source: PubMed Central journal article supplement (PMC7660501; doi:10.1371/journal.pone.0241646), 2020-11-12

**Figure S4**

**A**

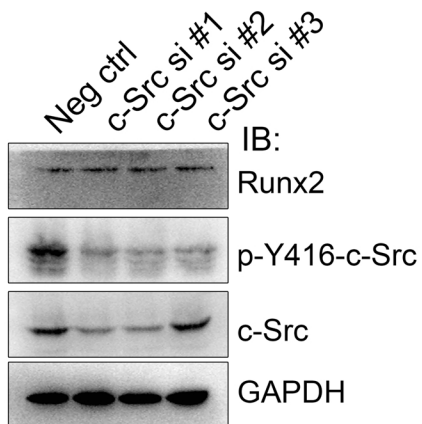

**B**

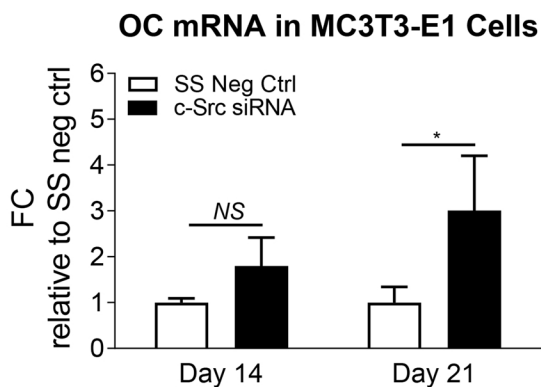

**C**

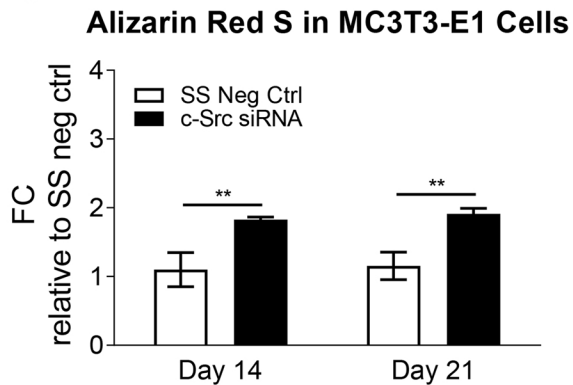

**D**

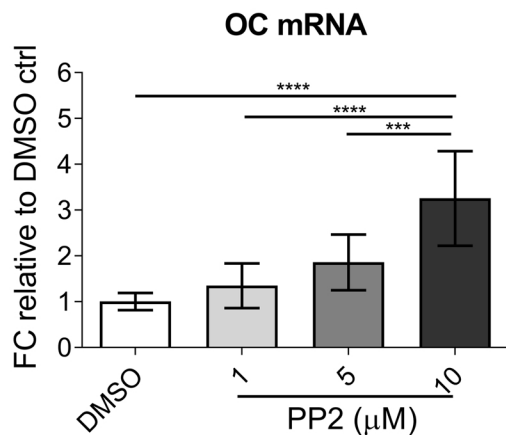

**E**

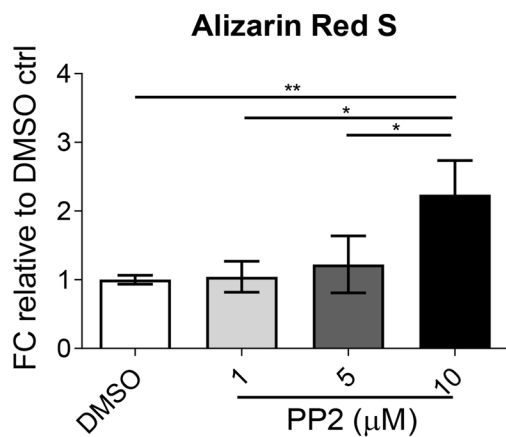

**F**

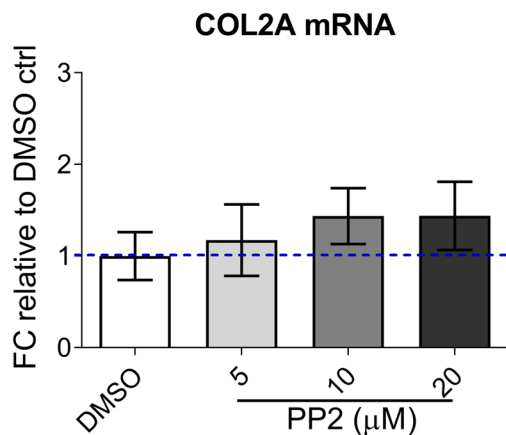

Supplement: pone.0241646.s004.pdf [file pone.0241646.s004.pdf]
